# Supplementary material
Source: ML conference proceedings conference paper supplement (https://openreview.net/forum?id=ZXHl9tUbm1)
Supplement: supplementary_material [file attachment]

# Supplementary Materials: A General Framework to Boost 3D GS Initialization for Text-to-3D Generation by Lexical Richness

Anonymous Authors

## 1 USER STUDIES

| Different init + LucidDreamer | Preference Percentage |
|-------------------------------|-----------------------|
| Sphere                        | 3.2%                  |
| Point-E                       | 4.0%                  |
| Shap-E                        | 4.8%                  |
| Ours                          | 88.0%                 |

**Table 1: Preferences for different initialization + LucidDreamer [2].**

| Our init + rendering optimization | Preference Percentage |
|-----------------------------------|-----------------------|
| DreamGaussian                     | 2.8%                  |
| GaussianDreamer                   | 31.6%                 |
| LucidDreamer                      | 65.6%                 |

**Table 2: Preferences for our initialization + different rendering optimization methods.**

We conduct the user studies based on a survey involving 50 participants, and 20 prompts with their corresponding 3D scene options. These scenes are generated using four initialization methods based on LucidDreamer [2], including Sphere, Point-E [3], Shap-E [1], and Ours. As shown in Tab. 1, 3.2% of the participants preferred scenes generated by Sphere initialization, 4% preferred those by Point-E initialization, 4.8% preferred Shap-E initialization, and a significant majority of 88% preferred scenes generated by Our initialization. Most participants think our initialization methods can provide the best generation results.

Furthermore, we also compare the different rendering optimization methods based on our initialization methods with DreamGaussian [4], GaussianDreamer [5], or LucidDreamer [2]. As demonstrated in Tab. 2, 2.8% of the participants favored scenes generated by DreamGaussian, 31.6% preferred GaussianDreamer, and 65.6% favored LucidDreamer. In conclusion, in most scenes, the users preferred our initialization with LucidDreamer.

## 2 MORE VISUAL RESULTS

From Fig. 1 to Fig. 8, we provide more visual comparisons of different initialization methods based on LucidDreamer [2].

From Fig. 9 to Fig. 12, we provide more visual comparisons of different rendering optimization methods based on our initialization, including DreamGaussian [4], GaussianDreamer [5], and LucidDreamer [2].

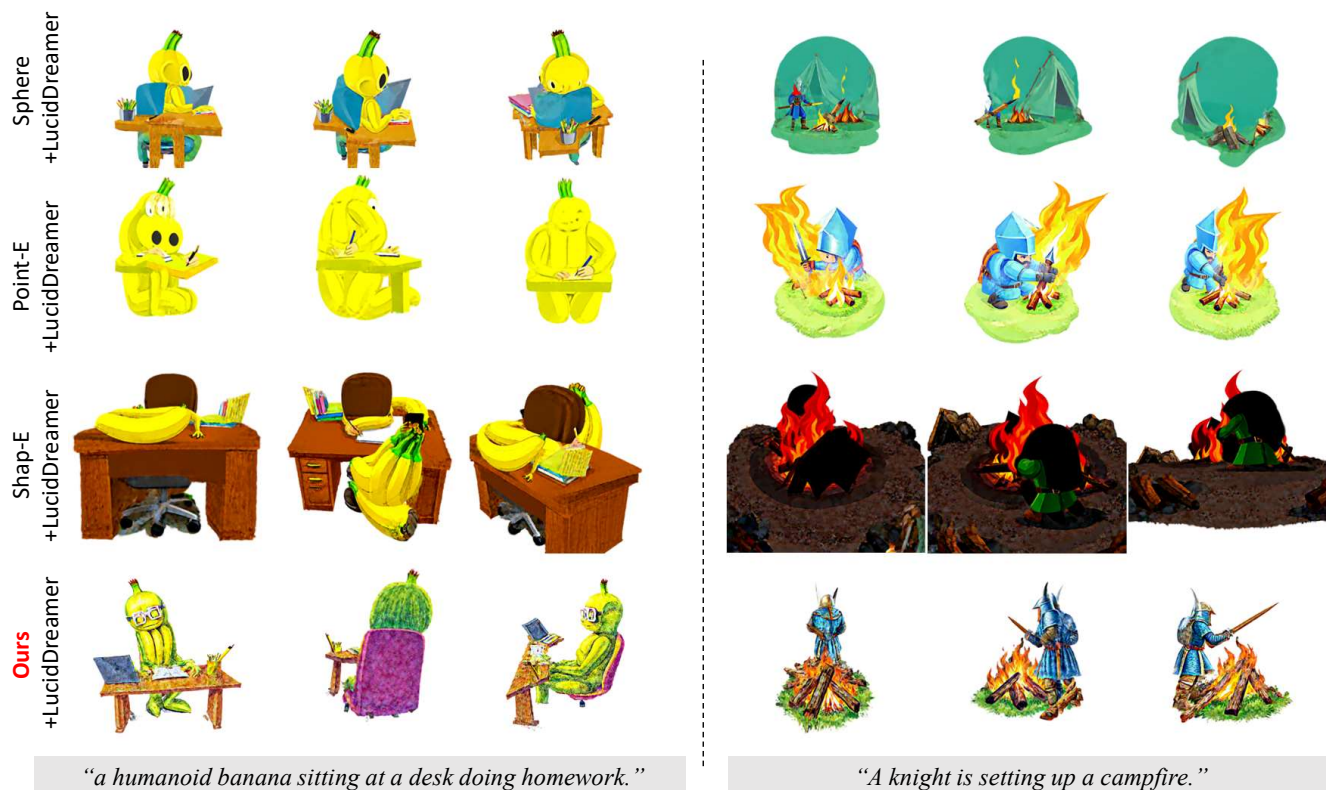

Figure 1: Visual comparison of different initialization methods based on LucidDreamer [2].

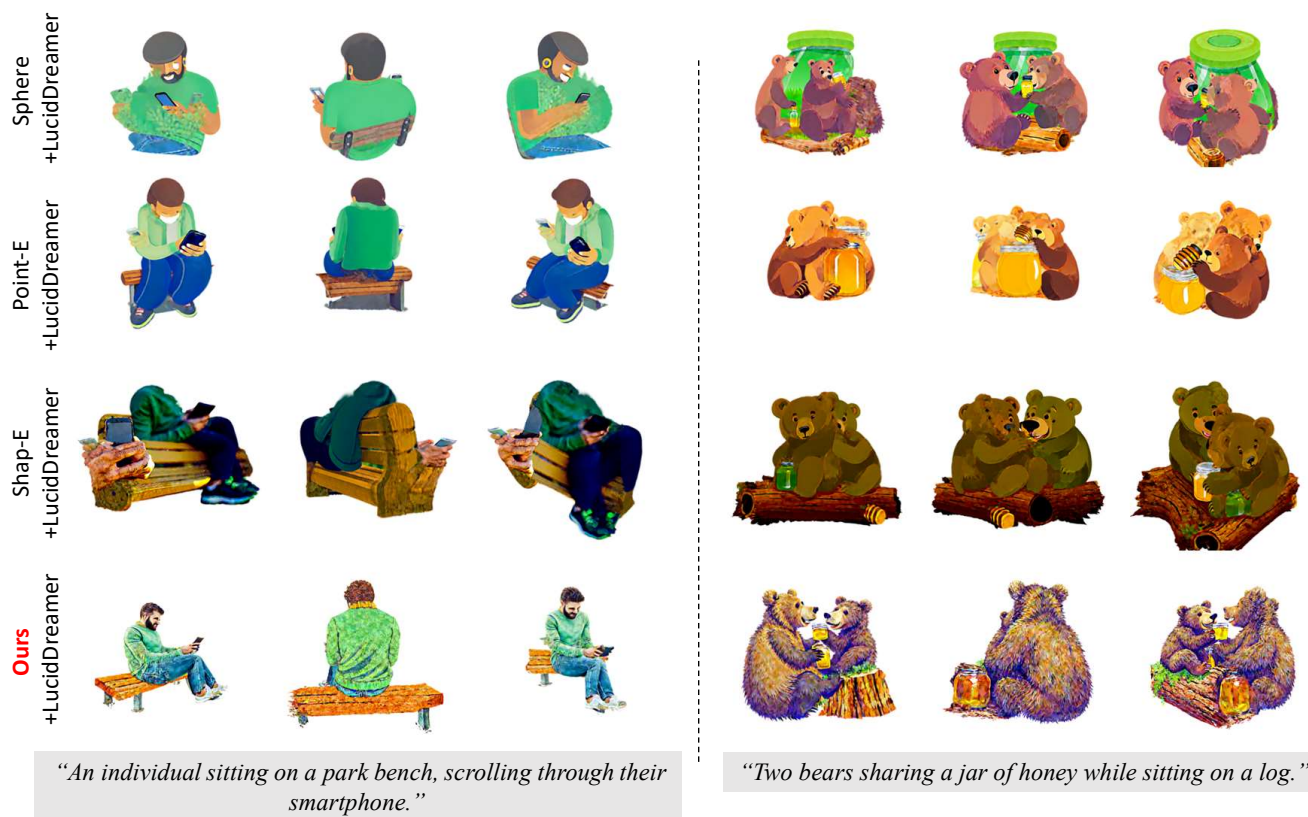

Figure 2: Visual comparison of different initialization methods based on LucidDremer [2].

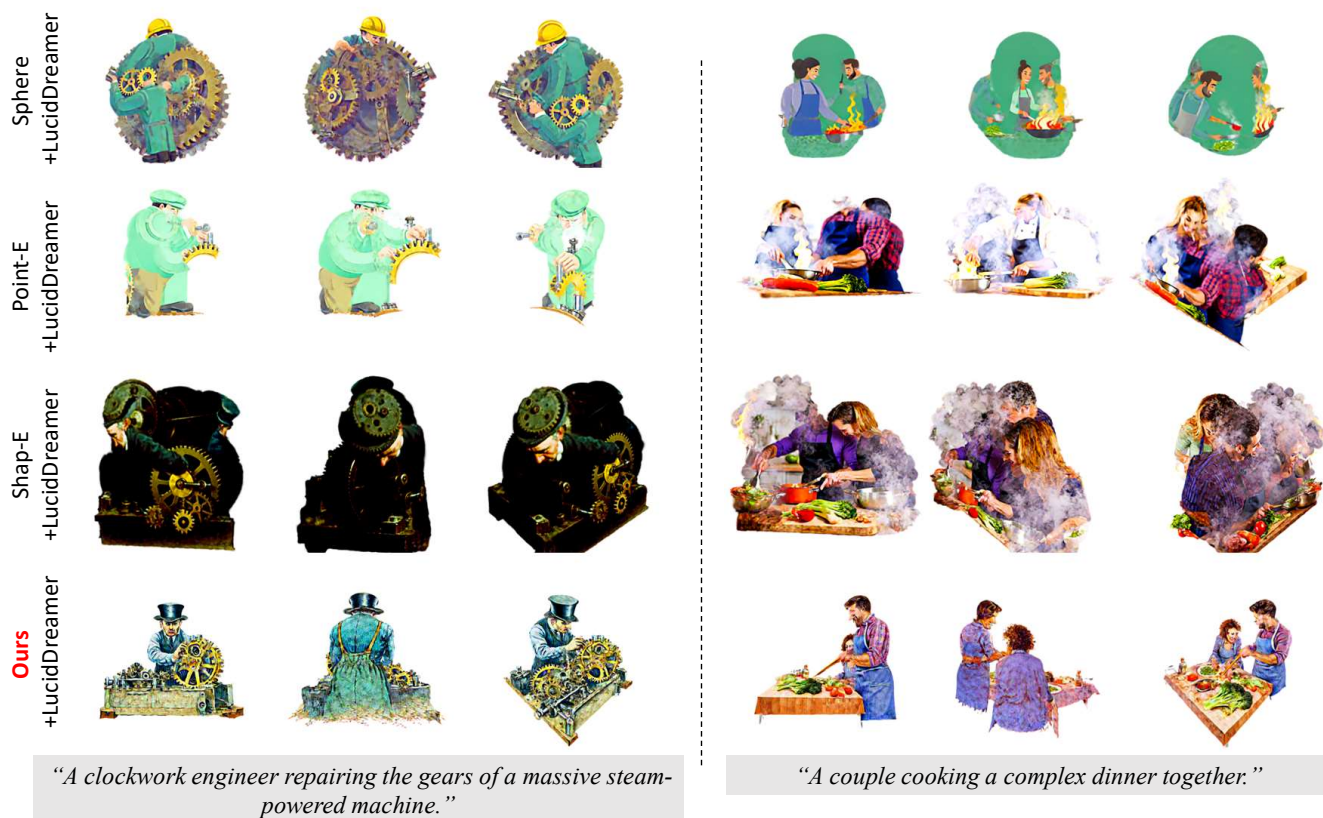

Figure 3: Visual comparison of different initialization methods based on LucidDreamer [2].

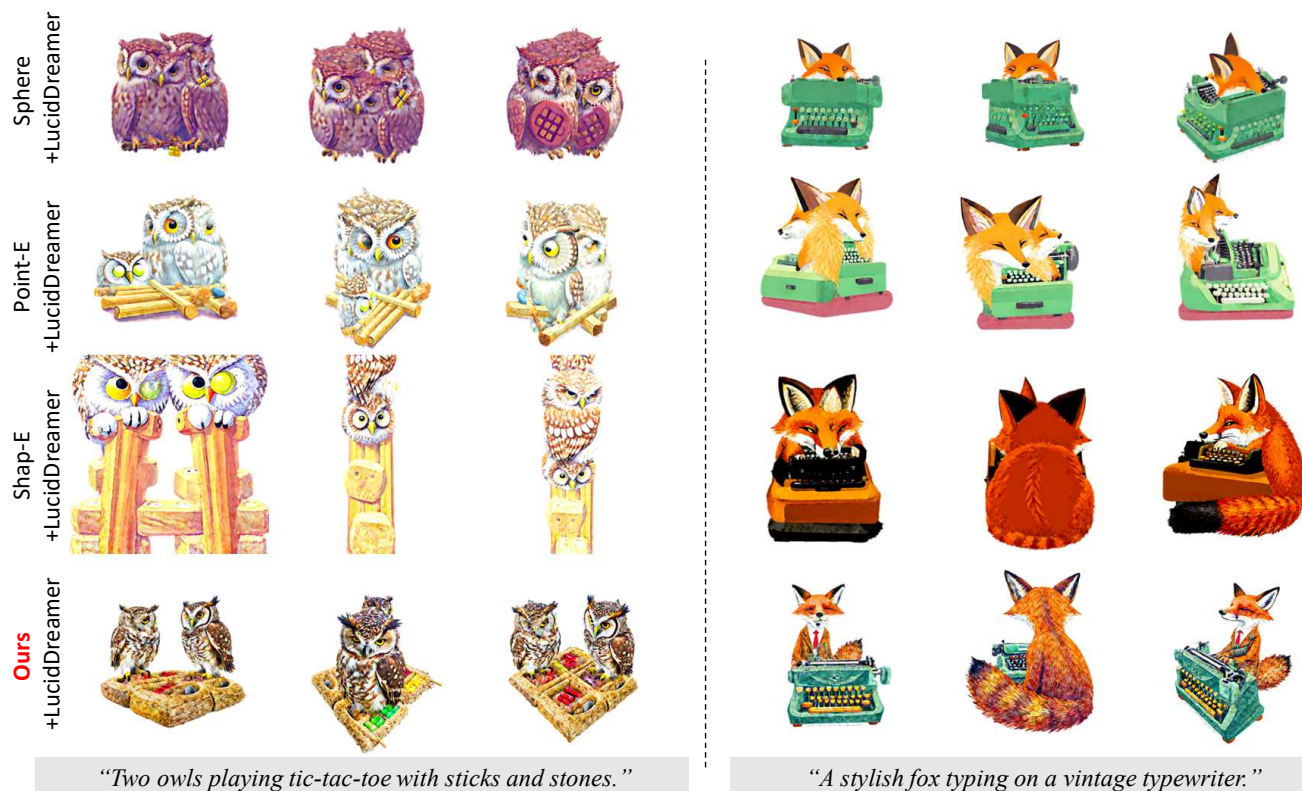

**Figure 4: Visual comparison of different initialization methods based on LucidDreamer [2].**



Sphere  
+LucidDreamer

Point-E  
+LucidDreamer

Shap-E  
+LucidDreamer

**Ours**  
+LucidDreamer

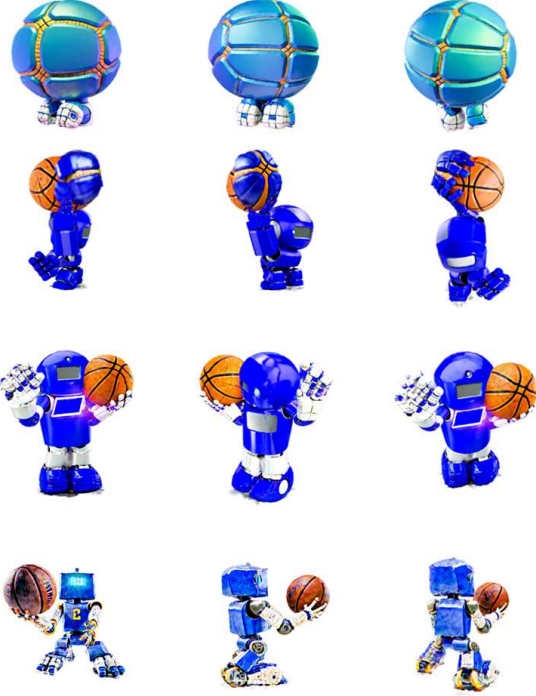

*"A robot single-handedly lifting a basketball."*

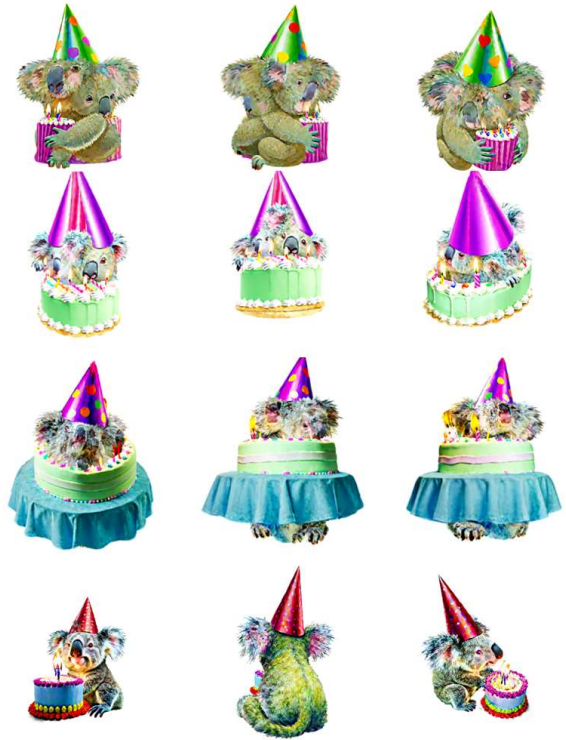

*"a koala wearing a party hat and blowing out candles."*

Figure 5: Visual comparison of different initialization methods based on LucidDreamer [2].

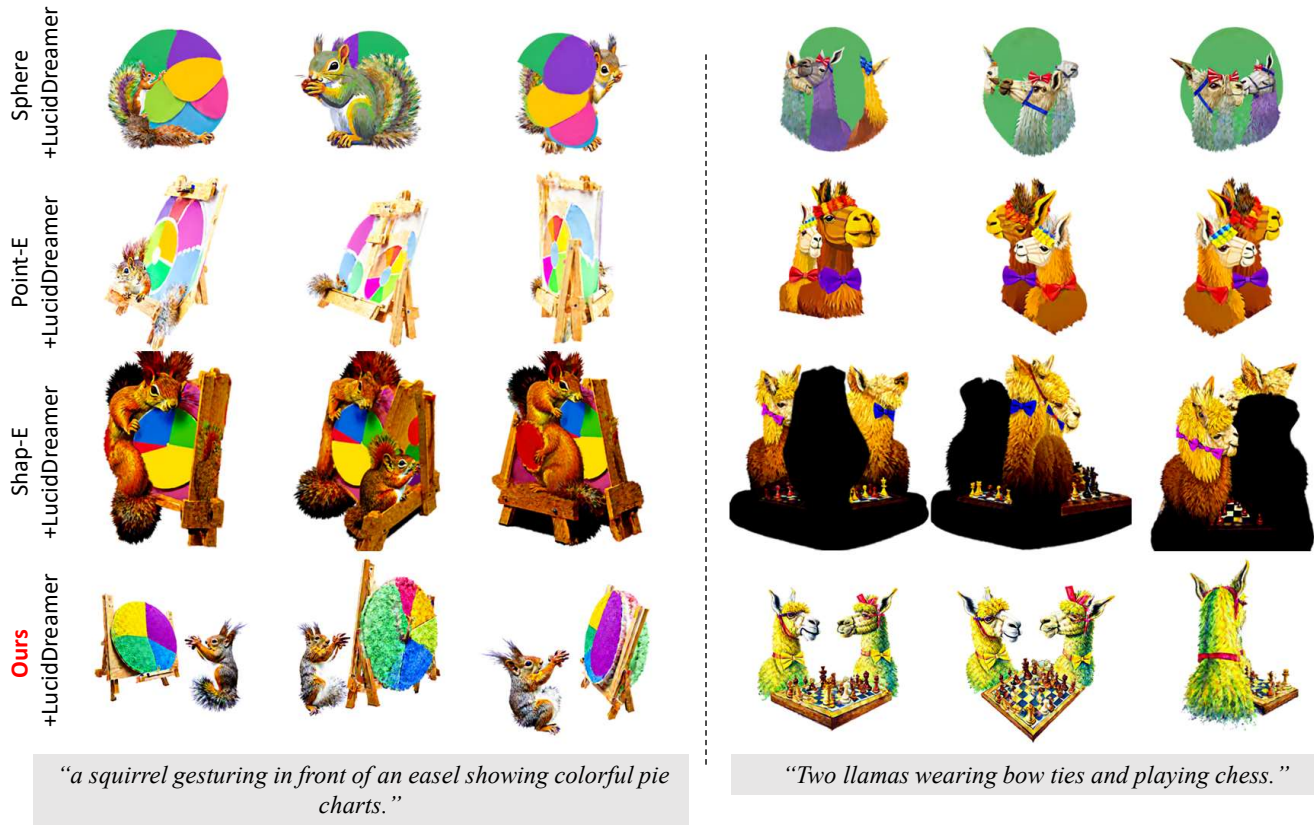

Figure 6: Visual comparison of different initialization methods based on LucidDreamer [2].

Sphere  
+LucidDreamer

Point-E  
+LucidDreamer

Shap-E  
+LucidDreamer

**Ours**  
+LucidDreamer

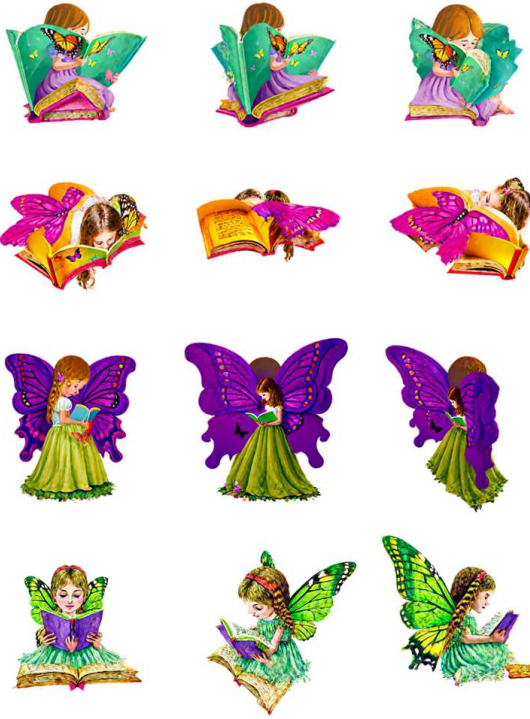

*"A young girl with butterfly wings, reading a fairy tale while sitting on a giant book."*

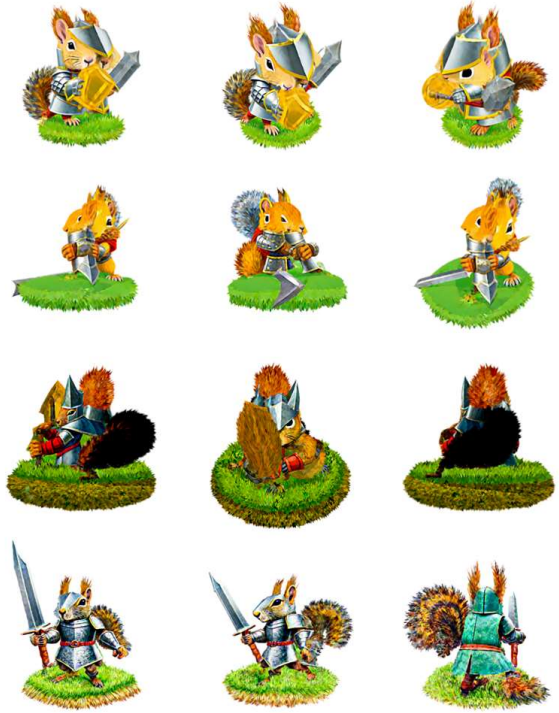

*"A squirrel knight in armor jousting on a lawn."*

Figure 7: Visual comparison of different initialization methods based on LucidDreamer [2].



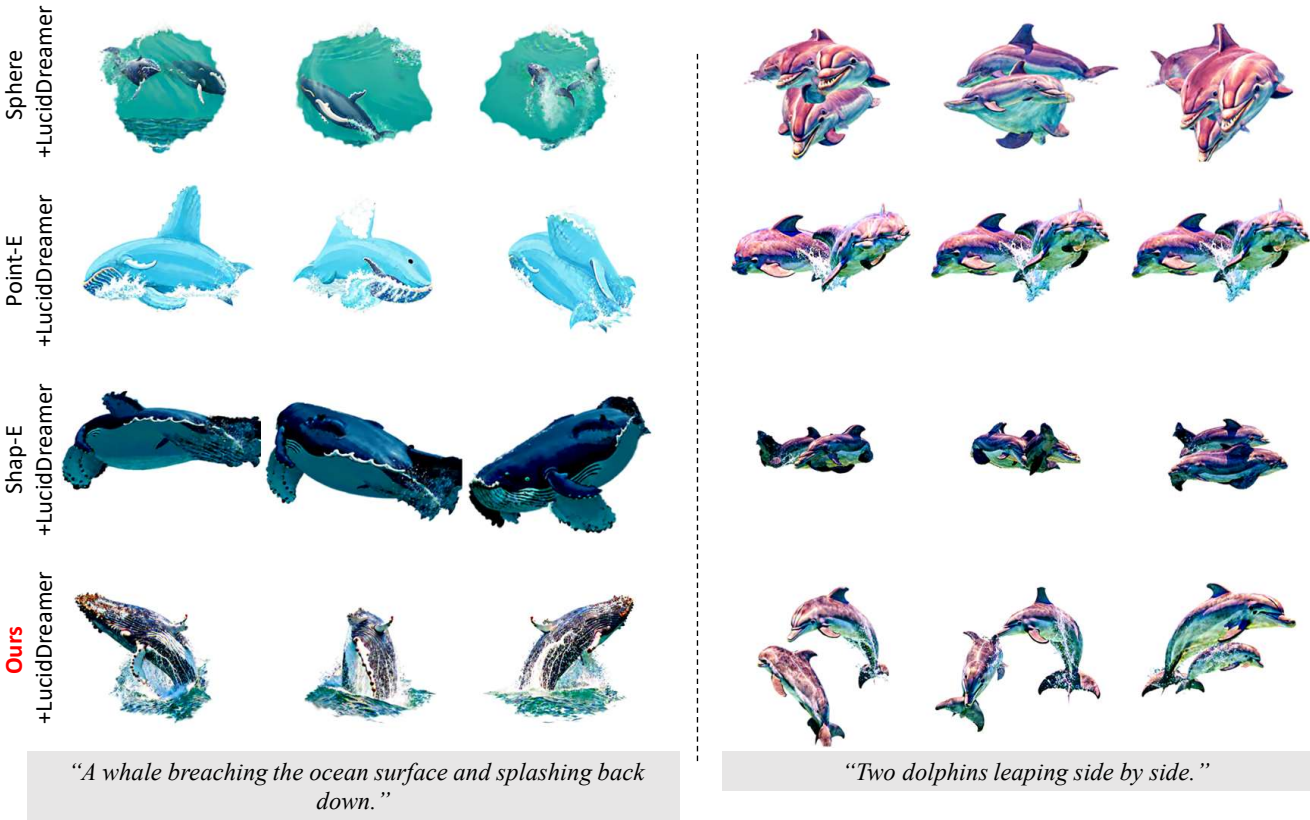

Figure 8: Visual comparison of different initialization methods based on LucidDreamer [2].

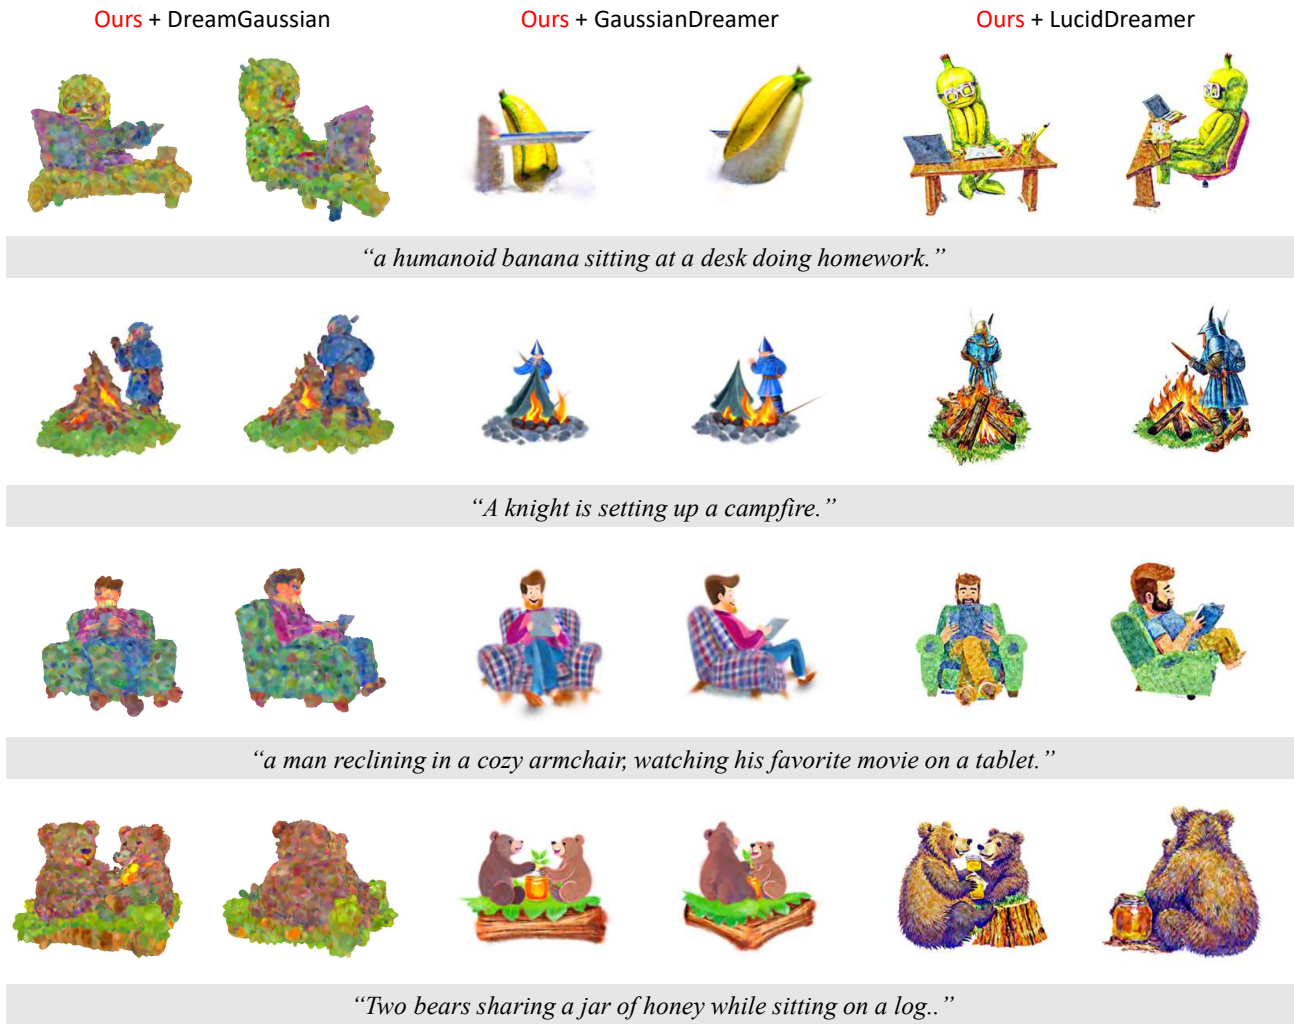

**Figure 9: Visual comparison of different rendering optimization methods based on our initialization, including DreamGaussian [4], GaussianDreamer [5], and LucidDreamer [2].**

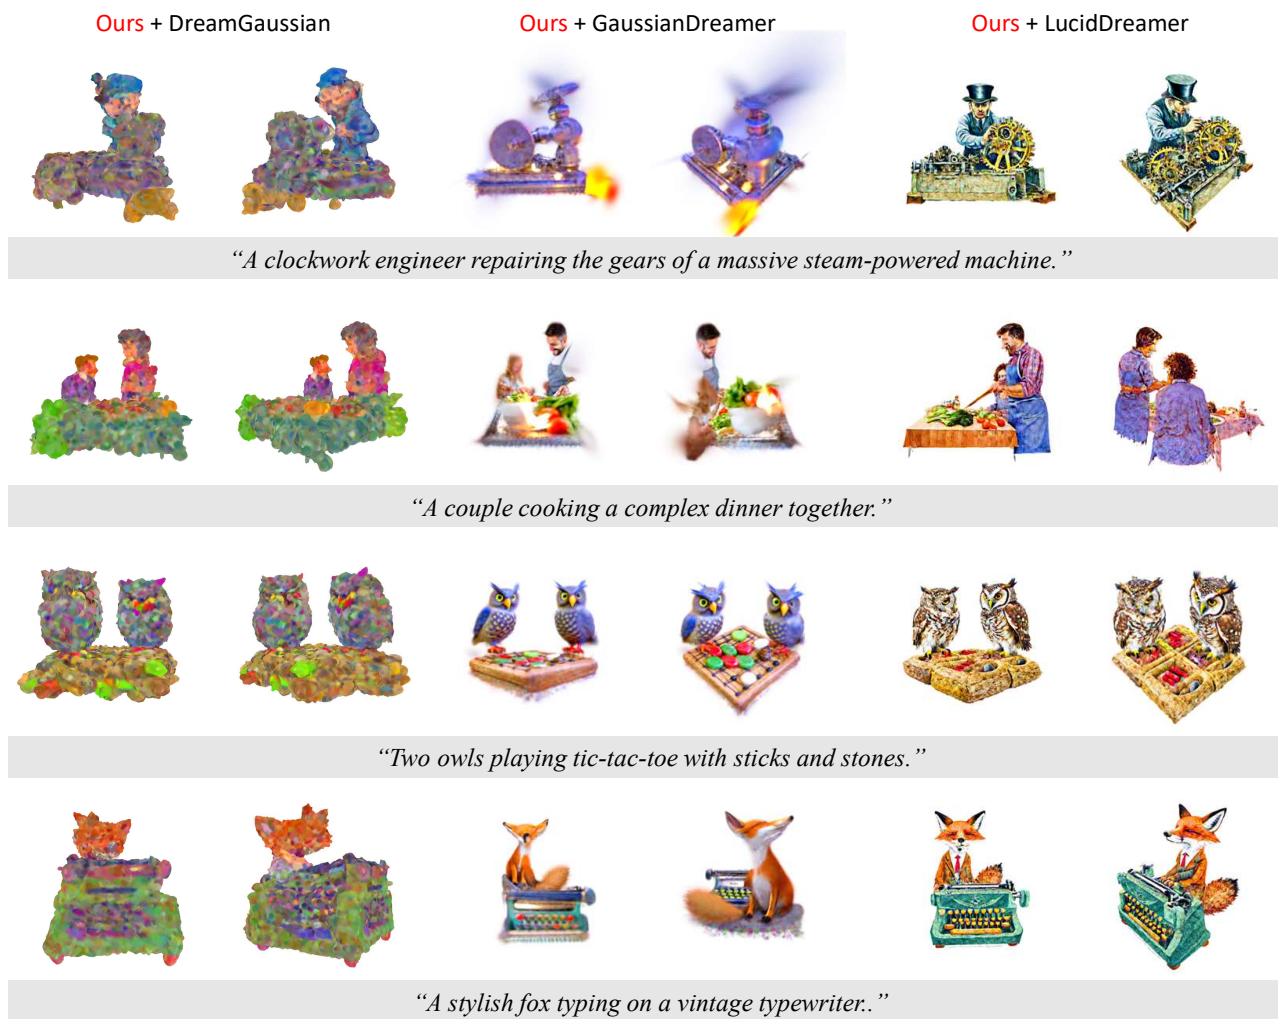

**Figure 10: Visual comparison of different rendering optimization methods based on our initialization, including DreamGaussian [4], GaussianDreamer [5], and LucidDreamer [2].**

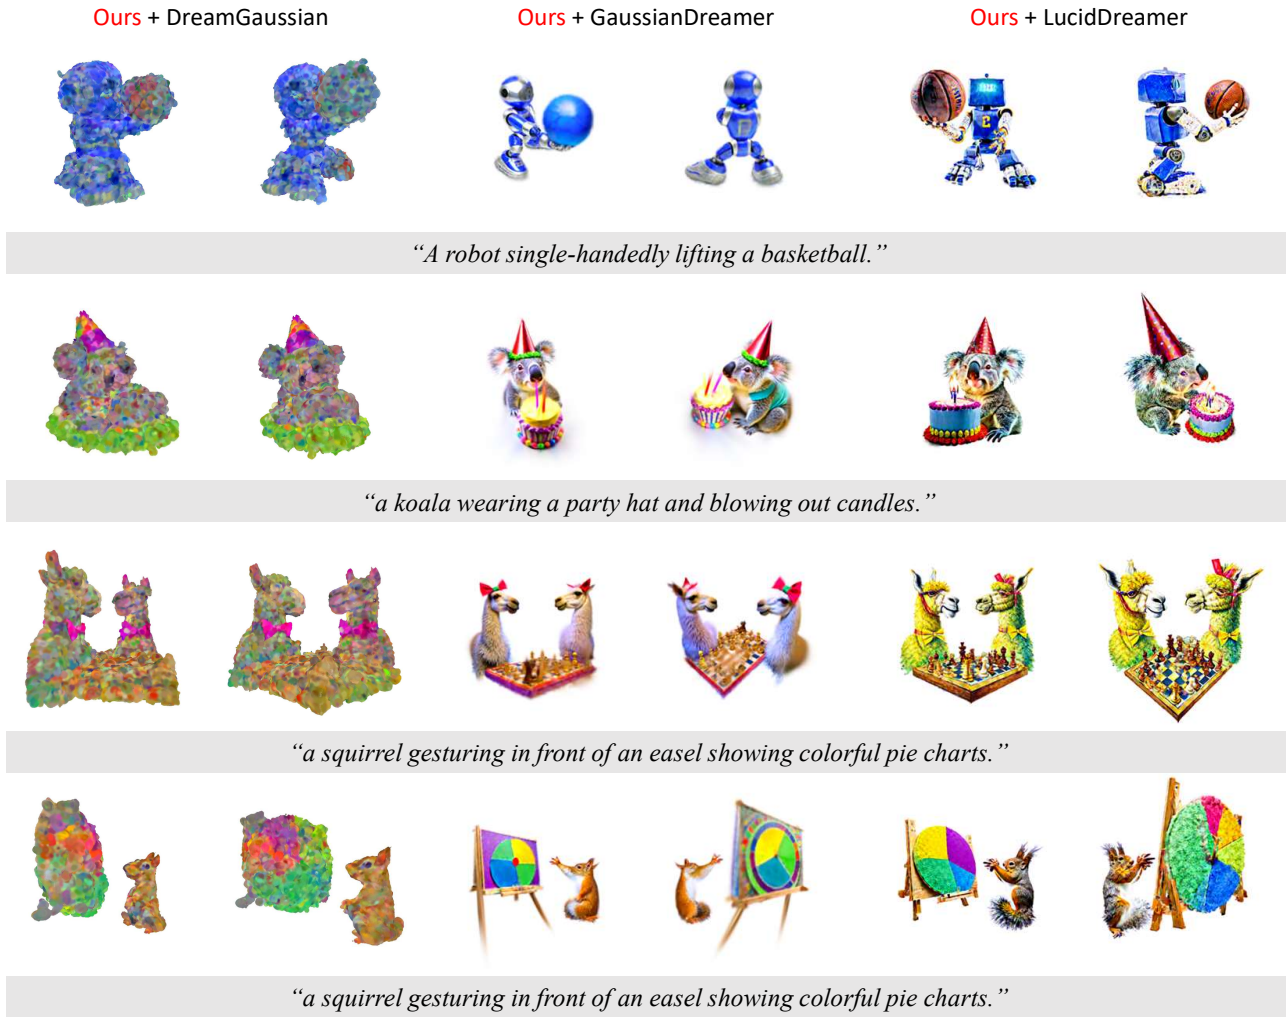

**Figure 11: Visual comparison of different rendering optimization methods based on our initialization, including DreamGaussian [4], GaussianDreamer [5], and LucidDreamer [2].**



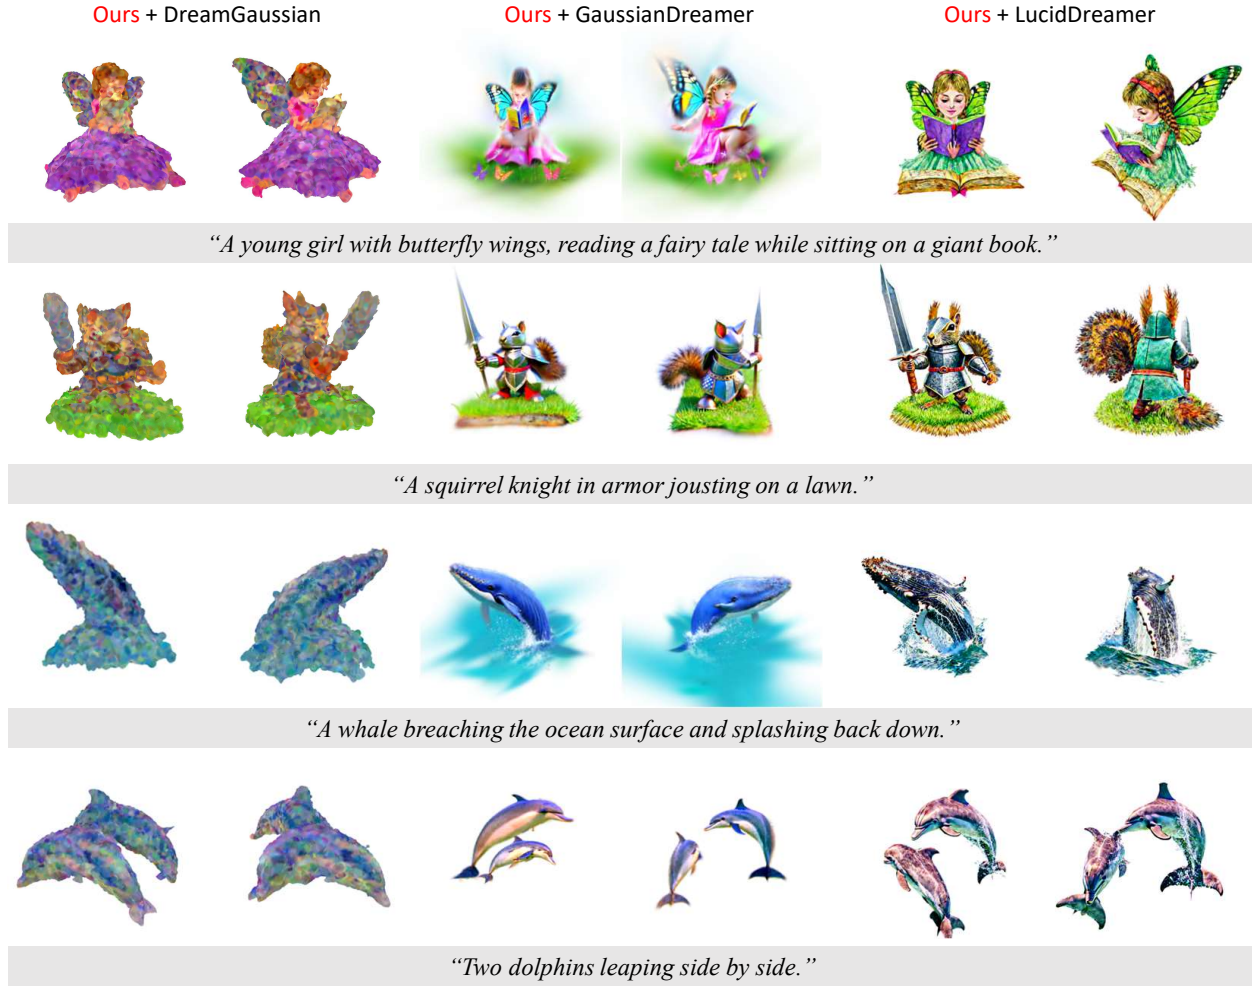

**Figure 12: Visual comparison of different rendering optimization methods based on our initialization, including DreamGaussian [4], GaussianDreamer [5], and LucidDreamer [2].**

REFERENCES

[1] Heewoo Jun and Alex Nichol. 2023. Shap-e: Generating conditional 3d implicit functions. *arXiv preprint arXiv:2305.02463* (2023).

[2] Yixun Liang, Xin Yang, Jiantao Lin, Haodong Li, Xiaogang Xu, and Yingcong Chen. 2023. LucidDreamer: Towards High-Fidelity Text-to-3D Generation via Interval Score Matching. *arXiv preprint arXiv:2311.11284* (2023).

[3] Alex Nichol, Heewoo Jun, Prafulla Dhariwal, Pamela Mishkin, and Mark Chen. 2022. Point-e: A system for generating 3d point clouds from complex prompts.

*arXiv preprint arXiv:2212.08751* (2022).

[4] Jiaxiang Tang, Jiawei Ren, Hang Zhou, Ziwei Liu, and Gang Zeng. 2023. Dream-gaussian: Generative gaussian splatting for efficient 3d content creation. *arXiv preprint arXiv:2309.16653* (2023).

[5] Taoran Yi, Jiemin Fang, Guanjun Wu, Lingxi Xie, Xiaopeng Zhang, Wenyu Liu, Qi Tian, and Xinggang Wang. 2023. Gaussiandreamer: Fast generation from text to 3d gaussian splatting with point cloud priors. *arXiv preprint arXiv:2310.08529* (2023).
